# Supplementary material
Source: PubMed Central journal article supplement (PMC395943)
Supplement: pnas_101_16_6182__1.pdf [file pnas_101_16_6182__1.pdf]

**Table 4. Top 20 PHX genes from genomes of  $G_{\text{low}}^+$  bacteria**

| Gene                                                                | $E(g)^*$              |                |                          |                          |                |             |             |                       |                |                |
|---------------------------------------------------------------------|-----------------------|----------------|--------------------------|--------------------------|----------------|-------------|-------------|-----------------------|----------------|----------------|
|                                                                     | BACSU                 | BACHA          | LISIN                    | LISMO                    | LACLA          | STRPY       | STRPN       | STAAU                 | CLOAC          | CLOPE          |
| <b>RPs</b>                                                          |                       |                |                          |                          |                |             |             |                       |                |                |
| RP L1 (rplA)                                                        | 1.91                  | 1.55           | 2.05                     | 2.03                     | 2.00           | 1.95        | 2.11        | <u>2.12</u>           | 1.18           | 1.71           |
| RP L2 (rplB)                                                        | <u>2.02</u>           | <u>1.69</u>    | 1.92                     | 1.85                     | 2.09           | <u>2.16</u> | 2.33        | 1.70                  | 1.40           | 1.52           |
| RP L3 (rplC)                                                        | 1.78                  | <u>1.60</u>    | 1.44                     | 1.42                     | 1.71           | 1.73        | 1.87        | 1.59                  | 1.30           | 1.85           |
| RP L4 (rplD)                                                        | <u>1.98</u>           | <u>1.67</u>    | 1.69                     | 1.73                     | 1.70           | 1.71        | 1.91        | 1.46                  | 1.23           | 1.24           |
| RP L5 (rplE)                                                        | 1.92                  | 1.35           | 1.34                     | 1.36                     | 1.79           | 1.69        | 2.17        | 1.79                  | <u>1.52</u>    | 1.72           |
| RP L6 (rplF)                                                        | 1.68                  | 1.43           | 1.55                     | 1.42                     | 1.83           | 2.09        | 2.15        | 1.76                  | 1.12           | 1.73           |
| RP L13 (rplM)                                                       | 1.91                  | 1.39           | 1.75                     | 1.77                     | 1.95           | 1.67        | 1.91        | 1.87                  | 1.33           | 1.47           |
| RP L14 (rplN)                                                       | <u>1.98</u>           | 1.43           | 1.30                     | 1.37                     | 1.51           | 1.69        | 1.89        | 1.70                  | 1.08           | 1.24           |
| RP L15 (rplO)                                                       | 1.83                  | 1.58           | 1.78                     | 1.52                     | 2.05           | 1.31        | 2.13        | 1.44                  | 1.09           | 1.70           |
| RP L16 (rplP)                                                       | 1.90                  | 1.49           | 1.66                     | 1.68                     | 1.67           | 1.85        | 1.89        | 1.42                  | 1.09           | 1.43           |
| RP L17 (rplQ)                                                       | 1.87                  | 1.51           | 1.69                     | 1.72                     | <u>2.31</u>    | —           | 1.83        | 2.03                  | 1.18           | 1.23           |
| RP L19 (rplS)                                                       | 1.84                  | <u>1.62</u>    | 1.54                     | 1.60                     | 1.90           | 1.76        | 1.99        | 1.71                  | 1.38           | 1.55           |
| RP L20 (rplT)                                                       | 1.57                  | 1.54           | 1.38                     | 1.42                     | 1.57           | 1.72        | 2.15        | 1.80                  | 1.24           | <u>1.96</u>    |
| RP S1 (rpsA)                                                        | 1.20                  | (1.01)         | (0.90)                   | 1.17                     | <u>2.14</u>    | <u>2.32</u> | 2.31        | (0.80)                | (0.74)         | (0.76)         |
| RP S2 (rpsB)                                                        | 1.84                  | 1.47           | 1.72                     | 1.67                     | <u>2.37</u>    | 2.03        | 2.30        | <u>2.09</u>           | 1.33           | 1.58           |
| RP S3 (rpsC)                                                        | 1.87                  | 1.48           | 1.69                     | 1.70                     | <u>2.17</u>    | 1.96        | 2.10        | 1.83                  | 1.21           | <u>1.99</u>    |
| RP S4 (rpsD)                                                        | <u>1.94</u>           | <u>1.61</u>    | 1.84                     | 1.82                     | 2.09           | <u>2.12</u> | 2.33        | <u>2.11</u>           | 1.19           | 1.67           |
| RP S5 (rpsE)                                                        | 1.89                  | 1.35           | 1.61                     | 1.52                     | 1.82           | 1.97        | 1.86        | 2.01                  | 1.30           | 1.51           |
| RP S6 (rpsF)                                                        | 1.67                  | 1.36           | 1.39                     | 1.50                     | 1.82           | 2.00        | 1.78        | 1.86                  | (1.06)         | 1.54           |
| RP S7 (rpsG)                                                        | 1.73                  | 1.45           | 1.49                     | 1.49                     | 1.98           | 1.95        | 2.12        | 1.63                  | 1.30           | 1.27           |
| RP S8 (rpsH)                                                        | 1.51                  | 1.47           | 1.28                     | 1.21                     | 2.07           | 1.56        | 2.09        | 1.60                  | 1.19           | 1.51           |
| RP S9 (rpsI)                                                        | 1.51                  | 1.53           | 1.86                     | 1.87                     | 1.52           | 1.92        | 1.87        | <u>2.36</u>           | <u>1.42</u>    | 1.46           |
| RP S12 (rpsL)                                                       | 1.84                  | 1.51           | 1.38                     | 1.39                     | 1.73           | 1.68        | 2.11        | 1.67                  | 1.20           | 1.29           |
| RP S13 (rpsM)                                                       | <u>2.02</u>           | 1.38           | 1.93                     | 1.86                     | 1.59           | 1.72        | 1.95        | 1.86                  | 1.27           | 1.23           |
| <b>TFs</b>                                                          |                       |                |                          |                          |                |             |             |                       |                |                |
| Translation elongation factor G (fus)                               | <u>2.34</u>           | <u>1.77</u>    | <u>2.34</u>              | <u>2.31</u>              | <u>2.46</u>    | <u>2.16</u> | <u>2.47</u> | <u>2.64</u>           | <u>1.45</u>    | <u>2.08</u>    |
| Translation elongation factor Ts (tsf)                              | 1.75                  | 1.44           | 1.98                     | <u>2.33</u>              | 1.41           | 1.87        | 2.35        | <u>2.11</u>           | 1.31           | 1.62           |
| Translation elongation factor Tu (tuf)                              | <u>1.97</u>           | 1.50           | 2.00                     | 1.92                     | 1.91           | 1.96        | 2.06        | <u>2.09</u>           | 1.14           | 1.42           |
| Translation initiation factor IF-2 (infB)                           | (0.79)                | (0.77)         | 1.06                     | 1.23                     | 1.65           | (0.56)      | 1.04        | 1.00                  | (1.04)         | <u>2.04</u>    |
| RNA polymerase $\beta$ -subunit (rpoB)                              | 1.49                  | 1.19           | <u>2.37</u>              | <u>2.19</u>              | 1.87           | 1.72        | 1.83        | 1.67                  | (0.98)         | 1.62           |
| RNA polymerase $\beta'$ -subunit (rpoC)                             | 1.76                  | 1.54           | <u>2.39</u>              | <u>2.26</u>              | 2.02           | 1.72        | 1.77        | 1.55                  | 1.19           | 1.53           |
| GTP-binding protein TypA/BipA                                       | 1.11                  | (0.78)         | 1.91                     | <u>2.09</u>              | 1.95           | 1.46        | 1.98        | (0.97)                | 1.18           | 1.45           |
| <b>Chaperones</b>                                                   |                       |                |                          |                          |                |             |             |                       |                |                |
| HSP 60 (groEL)                                                      | 1.87                  | <u>1.79</u>    | 1.91                     | 1.89                     | 1.23           | (0.86)      | 1.08        | 1.19                  | <u>1.45</u>    | (0.71)         |
| HSP70 (dnaK)                                                        | 1.83                  | 1.14           | <u>2.25</u>              | <u>2.17</u>              | 2.08           | <u>2.25</u> | 2.43        | <u>2.21</u>           | 1.38           | <u>2.19</u>    |
| Trigger factor (tig)                                                | 1.85                  | 1.53           | 2.02                     | 1.81                     | 1.86           | 1.55        | <u>2.55</u> | 2.02                  | <u>1.42</u>    | 1.60           |
| <b>Glycolysis</b>                                                   |                       |                |                          |                          |                |             |             |                       |                |                |
| Glucose-6-phosphate isomerase (pgi)                                 | (0.92)                | (0.93)         | 1.67                     | 1.77                     | <u>2.13</u>    | 1.57        | <u>2.46</u> | 1.33                  | 1.28           | 1.74           |
| Fructose-1,6-bisphosphate aldolase (fba)                            | <u>1.99</u><br>(0.59) | 1.20<br>(0.83) | 1.71<br>(0.67)<br>(etc.) | 1.70<br>(0.59)<br>(etc.) | 2.08           | 2.07        | 2.15        | 2.00                  | 1.20<br>(0.86) | 1.52<br>(0.71) |
| fructose-bisphosphate aldolase homolog (SAV2606)                    | —                     | —              | —                        | —                        | —              | —           | —           | 1.95                  | —              | —              |
| Glyceraldehyde-3-phosphate dehydrogenase (gap)                      | 1.80<br>(0.48)        | 1.53<br>(0.70) | 1.77                     | 1.72                     | 1.95<br>1.04   | <u>2.13</u> | 2.08        | <u>2.12</u><br>(0.69) | 1.27           | 1.48           |
| Phosphoglycerate kinase (pgk)                                       | 1.34                  | 1.09           | <u>2.08</u>              | 2.02                     | <u>2.30</u>    | <u>2.18</u> | 2.24        | 1.86                  | 1.34           | 1.65           |
| Phosphoglycerate mutase (gpmA)                                      | (0.70)                | —              | (0.93)                   | (1.04)                   | <u>2.27</u>    | 1.88        | 1.94        | (0.79)                | (0.95)         | —              |
| Phosphoglycerate mutase (2,3-bisphosphoglycerate-independent) (pgm) | 1.08                  | (0.88)         | 1.97                     | 1.98                     | —              | —           | —           | 1.15                  | 1.29           | 1.80           |
| Enolase (eno)                                                       | 1.92                  | <u>1.61</u>    | 1.83                     | 1.92                     | 1.96<br>(0.49) | <u>2.17</u> | 2.24        | <u>2.12</u>           | 1.26           | 1.51           |

| Gene                                                                                  | <i>E(g)*</i>               |                            |                               |                            |                                 |                  |                                         |                  |                     |                |
|---------------------------------------------------------------------------------------|----------------------------|----------------------------|-------------------------------|----------------------------|---------------------------------|------------------|-----------------------------------------|------------------|---------------------|----------------|
|                                                                                       | BACSU                      | BACHA                      | LISIN                         | LISMO                      | LACLA                           | STRPY            | STRPN                                   | STAAU            | CLOAC               | CLOPE          |
| Pyruvate kinase (pykA)                                                                | 1.18                       | (0.76)                     | <u>2.38</u>                   | <u>2.17</u>                | <u>2.25</u>                     | 2.04             | 2.28                                    | 1.70             | 1.29<br>1.29        | 1.68<br>(0.83) |
| <b>PTS enzymes</b>                                                                    |                            |                            |                               |                            |                                 |                  |                                         |                  |                     |                |
| Phosphotransferase enzyme IIC component (cellobiose-specific)                         | (0.57)<br>(0.46)<br>(0.45) | (0.57)                     | <u>2.06</u><br>1.16<br>(etc.) | 2.05<br>1.32<br>(etc.)     | 1.32<br>1.10<br>(0.47)          | (0.55)           | (1.01) <sup>†</sup><br>(0.60)<br>(0.49) | —                | 1.24                | —              |
| Phosphotransferase system component IID (mannose-specific) (manN)                     | —                          | —                          | 1.26<br>1.23                  | 1.47<br>1.09               | 1.85                            | <u>2.15</u>      | 1.54                                    | —                | —                   | 1.27<br>1.04   |
| PTS system, IIABC components <sup>‡</sup>                                             | —                          | —                          | —                             | —                          | —                               | (0.60)           | <u>2.43</u>                             | —                | —                   | (0.80)         |
| PTS system, phosphoenolpyruvate-protein phosphotransferase (ptsI, ptsA)               | 1.35                       | (0.94)                     | 1.13                          | 1.22                       | 2.07                            | 1.96             | 2.31                                    | 1.25             | 1.33                | 1.78           |
| mannose-specific PTS system component IIC (ptnC, manM)                                | (0.55)                     | —                          | 1.23<br>1.20                  | 1.28<br>1.16               | 1.98                            | 1.91             | 1.60                                    | 1.91             | —                   | 1.06           |
| <b>Pyruvate dehydrogenase, pyruvate oxidase</b>                                       |                            |                            |                               |                            |                                 |                  |                                         |                  |                     |                |
| pyruvate dehydrogenase E1 β-subunit (pdhB)                                            | 1.91                       | 1.31                       | 1.72                          | 1.75                       | 1.06                            | —                | —                                       | 1.81             | —                   | —              |
| Dihydrolipoamide acetyltransferase component of pyruvate dehydrogenase complex (pdhC) | <u>2.05</u>                | 1.48                       | 1.79                          | 1.81                       | (0.94)                          | —                | —                                       | 1.43             | —                   | —              |
| Dihydrolipoamide dehydrogenase E3 subunit of pyruvate dehydrogenase (pdhD)            | <u>2.14</u>                | 1.55                       | 1.98                          | 1.80                       | 1.09                            | —                | —                                       | 2.05             | —                   | —              |
| Pyruvate oxidase                                                                      | (0.47)                     | —                          | (0.86)                        | 1.03                       | (0.47)                          | —                | <u>2.48</u>                             | (0.66)           | —                   | —              |
| <b>Fermentation and anaerobic respiration</b>                                         |                            |                            |                               |                            |                                 |                  |                                         |                  |                     |                |
| Pyruvate formate-lyase (formate acetyltransferase) (pflB, pflA)                       | —                          | —                          | <u>2.40</u><br>1.98           | <u>2.49</u><br><u>2.09</u> | 1.78                            | <u>2.32</u>      | <u>2.87</u>                             | 2.09             | (0.98)              | <u>1.92</u>    |
| L-lactate dehydrogenase (ldh)                                                         | (0.76)                     | (0.69)                     | 1.63                          | 1.53                       | <u>2.26</u><br>(0.45)<br>(0.44) | 1.72             | 2.30                                    | (0.90)<br>(0.88) | (0.94)<br>(0.80)    | (0.78)         |
| Alcohol-acetaldehyde dehydrogenase (adhE)                                             | —                          | —                          | <u>2.08</u>                   | <u>2.14</u>                | 1.44                            | —                | 2.22                                    | (0.56)           | —                   | <u>2.00</u>    |
| Beta-hydroxybutyryl-CoA dehydrogenase, NAD-dependent (CAC2708)                        | (0.52)                     | (0.81)<br>(0.71)<br>(0.68) | —                             | —                          | —                               | —                | —                                       | —                | <u>1.44</u>         | 1.55           |
| Butyryl-CoA dehydrogenase (CAC2711)                                                   | (0.56)<br>(0.48)<br>(0.41) | (0.66)<br>(0.63)<br>(0.62) | —                             | —                          | —                               | —                | —                                       | —                | <u>1.44</u>         | 1.70<br>(0.66) |
| Pyruvate ferredoxin oxidoreductase (CAC2229, CPE2061)                                 | —                          | —                          | (0.51)                        | (0.45)                     | (0.40)                          | —                | —                                       | —                | <u>1.43</u><br>1.07 | <u>2.05</u>    |
| Putative NADH dehydrogenase (yjlD, ndh, nox))                                         | 1.87<br>(0.42)             | 1.07                       | 2.02<br>(0.92)                | 1.76<br>1.09               | 1.29<br>(0.66)                  | —                | —                                       | 1.87             | —                   | —              |
| NADH oxidase (nox)                                                                    | —                          | —                          | —                             | —                          | (0.35)                          | 1.46             | 2.36                                    | —                | —                   | —              |
| Electron transfer flavoprotein alpha-subunit (etfA, fixB)                             | (0.59)                     | (0.67)                     | —                             | —                          | —                               | —                | —                                       | —                | 1.37<br>(0.98)      | 1.12<br>(0.56) |
| <b>Use of alternative carbon sources</b>                                              |                            |                            |                               |                            |                                 |                  |                                         |                  |                     |                |
| Tagatose 1,6-diphosphate aldolase (lacD)                                              | —                          | —                          | 1.22                          | 1.20                       | —                               | (1.05)<br>(0.51) | 1.85                                    | 1.93             | —                   | —              |
| Altronate oxidoreductase (yjmI)                                                       | (0.46)                     | (0.56)                     | —                             | —                          | —                               | —                | —                                       | —                | 1.36                | —              |
| Glucuronate isomerase (uxaC)                                                          | (0.38)                     | (0.69)                     | —                             | —                          | (0.28)                          | —                | —                                       | —                | 1.35                | (0.45)         |
| <b>Detoxification</b>                                                                 |                            |                            |                               |                            |                                 |                  |                                         |                  |                     |                |
| Alkyl hydroperoxide reductase subunit C (ahpC)                                        | 1.66                       | —                          | —                             | —                          | (0.74)                          | 1.27             | —                                       | 2.02             | —                   | (0.94)         |
| <b>Amino acyl-tRNA synthetases</b>                                                    |                            |                            |                               |                            |                                 |                  |                                         |                  |                     |                |
| isoleucine-tRNA synthetase (ileS)                                                     | (0.78)                     | (0.63)                     | 1.16                          | 1.14                       | (0.97)                          | (0.65)           | 1.84                                    | (0.92)           | —                   | —              |
| isoleucine-tRNA synthetase (ileS)                                                     | —                          | —                          | —                             | —                          | —                               | —                | —                                       | —                | 1.02                | 1.89           |
| asparagine-tRNA synthetase (asnS)                                                     | (0.83)                     | (0.53)                     | (1.00)                        | 1.08                       | 1.16                            | (1.05)           | 1.32                                    | (0.96)           | 1.17                | 1.88           |
| lysine-tRNA synthetase (lysS)                                                         | 1.09                       | (0.59)                     | (1.07)                        | 1.34                       | 1.61                            | 1.09             | 1.73                                    | (0.75)           | (0.93)              | 1.87           |
| glycine-tRNA synthetase, class II (GRS1)                                              | —                          | —                          | —                             | —                          | —                               | —                | —                                       | 1.46             | 1.06                | 1.84           |
| <b>Amino acid biosynthesis</b>                                                        |                            |                            |                               |                            |                                 |                  |                                         |                  |                     |                |

| Gene                                                                          | <i>E(g)*</i>     |                                 |             |                     |                  |        |             |                        |                          |                  |
|-------------------------------------------------------------------------------|------------------|---------------------------------|-------------|---------------------|------------------|--------|-------------|------------------------|--------------------------|------------------|
|                                                                               | BACSU            | BACHA                           | LISIN       | LISMO               | LACLA            | STRPY  | STRPN       | STAAU                  | CLOAC                    | CLOPE            |
| Ketol-acid reductoisomerase (ilvC)                                            | 1.03             | <u>1.59</u>                     | 1.16        | 1.27                | (0.79)           | —      | 2.11        | (1.06)                 | 1.04                     | —                |
| Methionine synthase (metE)                                                    | (0.72)           | (0.88)                          | (0.56)      | (0.61) <sup>†</sup> | (0.44)           | —      | <u>2.44</u> | 1.34                   | —                        | —                |
| <b>Nucleotide biosynthesis</b>                                                |                  |                                 |             |                     |                  |        |             |                        |                          |                  |
| inositol-monophosphate dehydrogenase (guaB)                                   | 1.12             | (0.73)                          | (0.90)      | (0.87)              | (0.92)           | (0.99) | (0.98)      | 1.17                   | 1.35                     | 1.14             |
| GMP synthetase (guaA)                                                         | 1.31             | (0.82)                          | 1.20        | 1.14                | 1.62             | 1.17   | 1.59        | 1.28                   | 1.05                     | 1.79             |
| <b>Flagella</b>                                                               |                  |                                 |             |                     |                  |        |             |                        |                          |                  |
| Flagellin (flaA, hag)                                                         | 1.83<br>1.69     | 1.43<br>(0.90)                  | 2.04        | 2.09                | —                | —      | —           | —                      | 1.36<br>(0.89)<br>(0.80) | —                |
| <b>Transporters</b>                                                           |                  |                                 |             |                     |                  |        |             |                        |                          |                  |
| Permease of the Na <sup>+</sup> :galactoside symporter family (CAC0694, yjmB) | (0.46)           | —                               | —           | —                   | —                | —      | —           | —                      | <u>1.47</u>              | —                |
| ABC-type dipeptide/oligopeptide/nickel transport system (oppA)                | (0.75)           | —                               | 2.04        | 2.08                | —                | —      | —           | —                      | 1.18                     | —                |
| ABC transporter, substrate-binding protein (SP0092)                           | —                | (0.63)                          | (0.83)      | (0.82)              | (0.68)           | (0.80) | <u>2.73</u> | —                      | —                        | 1.54             |
| Oligonucleotide ABC transporter (BH0031)                                      | —                | <u>1.78</u><br>(0.66)<br>(etc.) | —           | —                   | —                | —      | —           | —                      | —                        | —                |
| Oligopeptide ABC transporter (CAC3643)                                        | (0.58)<br>(0.49) | (0.76)                          | (0.69)      | (0.75)              | (0.69)           | —      | —           | (0.51)                 | <u>1.42</u><br>(1.06)    | (0.65)           |
| sugar ABC transporter (msmX, msmK)                                            | (0.51)           | 1.23                            | 1.95        | 1.94                | 1.21             | (0.72) | 2.40        | (0.49)                 | (0.93)                   | 1.35             |
| <b>Glycogen degradation</b>                                                   |                  |                                 |             |                     |                  |        |             |                        |                          |                  |
| Glycogen phosphorylase (glgP)                                                 | (0.39)           | (0.52)                          | —           | —                   | (0.42)           | 1.27   | <u>2.88</u> | —                      | (0.90)                   | (0.57)<br>(0.43) |
| Phosphoglucomutase                                                            | (0.54)           | (0.64)                          | (0.44)      | (0.56)              | —                | (0.84) | <u>2.46</u> | —                      | —                        | —                |
| <b>Other</b>                                                                  |                  |                                 |             |                     |                  |        |             |                        |                          |                  |
| P60 extracellular protein, invasion-associated (iap)                          | —                | —                               | <u>2.16</u> | 1.76                | —                | —      | —           | —                      | —                        | —                |
| Hypothetical protein (CPE1232)                                                | —                | —                               | —           | —                   | —                | —      | —           | —                      | 1.35                     | <u>2.00</u>      |
| Hypothetical protein (CPE1233)                                                | —                | —                               | —           | —                   | —                | —      | —           | —                      | 1.30                     | <u>1.90</u>      |
| Transcriptional pleiotropic regulator of transition state genes (abrB)        | 1.49             | 1.52                            | (0.90)      | (0.71)              | —                | —      | —           | —                      | 1.24<br>1.17<br>(1.03)   | x                |
| Conserved lipoprotein (lin2786, lmo2637)                                      | —                | —                               | 1.91        | 1.92                | —                | —      | —           | —                      | —                        | —                |
| Outer membrane lipoprotein (plp)                                              | —                | —                               | —           | —                   | (0.62)<br>(0.38) | (0.62) | 2.38        | —                      | —                        | —                |
| Secretory antigen precursor SsaA homolog (ssaA)                               | —                | —                               | —           | —                   | —                | —      | —           | 2.03<br>1.19<br>(1.04) | —                        | —                |
| Cellulase CelE ortholog, dockerin domain (CAC0561)                            | —                | —                               | —           | —                   | —                | —      | —           | —                      | 1.35                     | —                |
| Probable manganase-dependent inorganic pyrophosphatase                        | 1.47             | —                               | (0.95)      | 1.18                | 1.57             | (0.85) | 1.64        | 1.24                   | 1.18                     | 1.84             |

Included are all genes ranking among the top 20 PHX genes in any of the eight genomes (underlined if among top 10) and their homologs in other genomes even if they are not among the top 20.

\*Numbers in parentheses indicate the gene is not PHX; —, the gene does not have a homolog in the genome; etc., more than three homologs; x, PHX status not evaluated due to length <80 codons.

<sup>†</sup>PA gene.

<sup>‡</sup>All genomes have homologs of PTS system IIABC components but of lower similarity (≈30%).

Those listed exhibit high mutual similarity (>50%).
