# Supplementary material
Source: PubMed Central journal article supplement (PMC395943)
Supplement: pnas_101_16_6182__2.pdf [file pnas_101_16_6182__2.pdf]

**Table 5. Glycolysis, PTS, mixed acid fermentation, TCA cycle, and detoxification genes**

| Gene                                                                         | <i>E(g)*</i>               |                         |                               |                          |                        |                            |                                         |                       |                  |                            |
|------------------------------------------------------------------------------|----------------------------|-------------------------|-------------------------------|--------------------------|------------------------|----------------------------|-----------------------------------------|-----------------------|------------------|----------------------------|
|                                                                              | BACSU                      | BACHA                   | LISIN                         | LISMO                    | LACLA                  | STRPY                      | STRPN                                   | STAAU                 | CLOAC            | CLOPE                      |
| <b>Glycolysis</b>                                                            |                            |                         |                               |                          |                        |                            |                                         |                       |                  |                            |
| Glucokinase (glk) <sup>†</sup>                                               | (0.50)                     | (0.65)                  | (0.98)                        | (0.75)                   | 1.30                   | (0.78)                     | 1.50                                    | (0.51)                | (0.94)           | 1.17                       |
| Glucose-6-phosphate isomerase (pgi)                                          | (0.92)                     | (0.93)                  | 1.67                          | 1.77                     | <u>2.13</u>            | 1.57                       | <u>2.46</u>                             | 1.33                  | 1.28             | 1.74                       |
| 6-phosphofructokinase (pfk)                                                  | (0.89)                     | (0.71)                  | 1.09                          | 1.07                     | 1.76                   | 1.43                       | 1.78                                    | (0.56)                | (0.97)           | 1.60                       |
| Fructose-1,6-bisphosphate aldolase (fba)                                     | <u>1.99</u><br>(0.59)      | 1.20<br>(0.83)          | 1.71<br>(0.67)<br>(etc.)      | 1.70<br>(0.59)<br>(etc.) | 2.08                   | 2.07                       | 2.15                                    | 2.00                  | 1.20<br>(0.86)   | 1.52<br>(0.71)             |
| Triosephosphate isomerase (tpi)                                              | 1.48                       | (0.96)                  | 1.61                          | 1.68                     | 1.92                   | 1.59                       | 1.93                                    | 1.73                  | 1.21             | 1.60                       |
| Glyceraldehyde-3-phosphate dehydrogenase (gap)                               | 1.80<br>(0.48)             | 1.53<br>(0.70)          | 1.77                          | 1.72                     | 1.95<br>1.04           | <u>2.13</u>                | 2.08                                    | <u>2.12</u><br>(0.69) | 1.27             | 1.48                       |
| Phosphoglycerate kinase (pgk)                                                | 1.34                       | 1.09                    | <u>2.08</u>                   | 2.02                     | <u>2.30</u>            | <u>2.18</u>                | 2.24                                    | 1.86                  | 1.34             | 1.65                       |
| Phosphoglycerate mutase (gpmA)                                               | (0.70)                     | —                       | (0.93)                        | (1.04)                   | <u>2.27</u>            | 1.88                       | 1.94                                    | (0.79)                | (0.95)           | —                          |
| Phosphoglycerate mutase (2,3-bisphosphoglycerate-independent) (pmg)          | 1.08                       | (0.88)                  | 1.97                          | 1.98                     | —                      | —                          | —                                       | 1.15                  | 1.29             | 1.80                       |
| Enolase (eno)                                                                | 1.92                       | <u>1.61</u>             | 1.83                          | 1.92                     | 1.96<br>(0.49)         | <u>2.17</u>                | 2.24                                    | <u>2.12</u>           | 1.26             | 1.51                       |
| Pyruvate kinase (pykA)                                                       | 1.18                       | (0.76)                  | <u>2.38</u>                   | <u>2.17</u>              | <u>2.25</u>            | 2.04                       | 2.28                                    | 1.70                  | 1.29<br>1.29     | 1.68<br>(0.83)             |
| <b>PTS</b>                                                                   |                            |                         |                               |                          |                        |                            |                                         |                       |                  |                            |
| PTS system, IIA component (cellobiose-specific or lactose-specific)          | (0.74)<br>(0.61)           | (0.81)<br>(0.78)        | 1.15<br>1.11<br>etc           | 1.21<br>1.14<br>etc      | (0.97)                 | (0.77)<br>(0.69)<br>(0.63) | (0.79)<br>(0.73)<br>etc                 | (0.72)                | (0.98)<br>(0.92) | (0.65)                     |
| PTS system, IIB component (cellobiose-specific) <sup>‡</sup>                 | (0.79)<br>(0.61)           | (0.75)<br>(0.74)        | 1.08<br>(1.05)<br>etc         | 1.12<br>1.06<br>etc      | 1.19                   | (0.86)<br>(0.75)           | (0.80)<br>(0.78)                        | —                     | (1.04)           | (0.64)                     |
| Phosphotransferase enzyme IIC component (cellobiose-specific)                | (0.57)<br>(0.46)<br>(0.45) | (0.57)                  | <u>2.06</u><br>1.16<br>(etc.) | 2.05<br>1.32<br>(etc.)   | 1.32<br>1.10<br>(0.47) | (0.55)                     | (1.01) <sup>§</sup><br>(0.60)<br>(0.49) | —                     | 1.24             | —                          |
| PTS system, IIABC component (trehalose-, sucrose-, or β-glucosides-specific) | (0.45)<br>(0.44)<br>(0.41) | (0.74)<br>(0.72)<br>etc | 1.73<br>(0.81)                | 1.78<br>(0.77)<br>etc    | (0.65)<br>(0.48)       | (0.57)<br>(0.43)<br>(0.33) | 1.84<br>(0.58)<br>(0.47)                | (0.50)<br>(0.40)      | 1.20<br>1.04     | (0.92)<br>(0.58)           |
| PTS system, IIA component (mannitol-specific)                                | —                          | (0.86)                  | —                             | —                        | (0.63)                 | —                          | (0.63)                                  | (0.84)                | 1.05             | —                          |
| PTS system, IIA component (mannitol/fructose-specific)                       | —                          | —                       | (0.71)<br>(0.68)<br>(0.64)    | (0.75)<br>(0.71)<br>etc  | —                      | —                          | (0.57)                                  | —                     | 1.11             | —                          |
| PTS system, IIAB component (mannose-specific or fructose-specific)           | (0.62)                     | —                       | 1.36<br>(1.05)<br>(0.73)      | 1.26<br>(1.10)<br>(0.84) | 1.45                   | 1.67                       | 1.17<br>1.14<br>(0.58)                  | —                     | —                | (0.82)<br>(0.71)<br>(0.70) |
| PTS system, IIBC components (mannitol-specific)                              | (0.52)                     | (0.75)                  | (0.49)                        | (0.48)                   | —                      | —                          | (0.66)                                  | (0.62)                | 1.15             | —                          |

| Gene                                                                                 | $E(g)^*$                   |                             |                          |                            |        |             |                |                          |                            |                  |
|--------------------------------------------------------------------------------------|----------------------------|-----------------------------|--------------------------|----------------------------|--------|-------------|----------------|--------------------------|----------------------------|------------------|
|                                                                                      | BACSU                      | BACHA                       | LISIN                    | LISMO                      | LACLA  | STRPY       | STRPN          | STAAU                    | CLOAC                      | CLOPE            |
| PTS system, IIC component (mannose-specific or fructose-specific)                    | (0.55)                     | —                           | 1.23<br>1.20             | 1.28<br>1.16               | 1.98   | 1.91        | 1.60<br>(0.70) | —                        | —                          | 1.06<br>(0.91)   |
| Phosphotransferase system component IID (mannose-specific) (manN)                    | —                          | —                           | 1.26<br>1.23             | 1.47 1.09                  | 1.85   | <u>2.15</u> | 1.54           | —                        | —                          | 1.27<br>1.04     |
| PTS system, IIABC components (fructose-specific)                                     | (0.87)<br>(0.41)           | 1.04                        | (0.77)<br>(0.76)<br>etc  | 1.01<br>(0.81)<br>etc      | (0.75) | (0.73)      | 1.69<br>(0.79) | (0.84)<br>(0.43)         | 1.16                       | (0.87)           |
| PTS system, component IIA (glucose-specific)                                         | (0.70)                     | —                           | (0.68)                   | (0.83)                     | (0.61) | —           | —              | (1.00)                   | (0.96)<br>(0.90)<br>(0.85) | 1.12             |
| PTS system, IIABC components (mostly glucose-specific or acetylglucosamine-specific) | (0.80)<br>(0.45)<br>(0.52) | 1.29<br>(0.73)<br>(0.74)    | —                        | —                          | —      | —           | —              | 1.59<br>(0.86)<br>(0.70) | 1.20<br>1.19               | (0.77)<br>(0.69) |
| PTS system, IIB component (galactitol-specific)                                      | (0.95)                     | —                           | 1.16<br>(0.90)<br>(0.79) | 1.20<br>(0.86)<br>(0.79)   | —      | —           | —              | (0.99)                   | —                          | —                |
| PTS system, IIC component (galactitol-specific)                                      | (0.66)                     | —                           | 1.40<br>(0.68)<br>(0.64) | 1.33<br>(0.69)<br>(0.67)   | —      | —           | —              | (0.46)                   | —                          | —                |
| PTS system, IIBC component (lactose-specific)                                        | —                          | —                           | —                        | —                          | —      | 1.18        | 1.15<br>(0.53) | (0.62)                   | 1.07                       | —                |
| PTS system, histidine-containing phosphocarrier protein (hpr)                        | 1.50<br>(0.86)             | 1.11<br>(0.97) <sup>†</sup> | 1.31                     | 1.26                       | 1.73   | 1.50        | 1.87           | 1.44                     | 1.18                       | 1.28             |
| PTS system, enzyme I (ptsI)                                                          | 1.35                       | (0.94)                      | 1.13                     | 1.22                       | 2.07   | 1.96        | 2.31           | 1.25                     | 1.33                       | 1.78             |
| PTS system, IIABC components                                                         | —                          | —                           | —                        | —                          | —      | (0.60)      | <u>2.43</u>    | —                        | —                          | (0.80)           |
| PTS system, IIB component                                                            | —                          | —                           | (0.86)<br>(0.82)         | 1.03<br>(0.95)<br>etc      | —      | —           | (0.67)         | —                        | —                          | —                |
| PTS system, IIB component                                                            | —                          | —                           | (0.81)                   | (0.93)                     | —      | 1.06        | (0.74)         | —                        | —                          | (0.76)           |
| PTS system, IIC component                                                            | —                          | —                           | (0.63)                   | (0.69)                     | —      | —           | 1.91           | —                        | —                          | (0.93)           |
| PTS system, IID component                                                            | —                          | —                           | (0.58)                   | (0.62)                     | —      | —           | 2.12           | —                        | —                          | —                |
| Putative PTS system, IIA component                                                   | —                          | —                           | —                        | —                          | —      | (0.55)      | (0.66)         | —                        | 1.06                       | —                |
| Putative PTS system, IIB component                                                   | —                          | —                           | —                        | —                          | —      | (0.71)      | 1.57<br>1.39   | —                        | 1.09                       | —                |
| Putative PTS system, IIC component                                                   | —                          | —                           | —                        | —                          | —      | (0.58)      | 2.13           | —                        | (0.84)                     | —                |
| Putative PTS system, membrane component                                              | —                          | —                           | —                        | —                          | —      | 1.12        | (0.76)         | —                        | —                          | —                |
| <b>Fermentation</b>                                                                  |                            |                             |                          |                            |        |             |                |                          |                            |                  |
| Pyruvate formate-lyase (formate acetyltransferase) (pflB, pflA)                      | —                          | —                           | <u>2.40</u><br>1.98      | <u>2.49</u><br><u>2.09</u> | 1.78   | <u>2.32</u> | <u>2.87</u>    | 2.09                     | (0.98)                     | <u>1.92</u>      |

| Gene                                                                | <i>E(g)*</i>               |                            |                |                |                                 |                  |        |                            |                                            |                       |
|---------------------------------------------------------------------|----------------------------|----------------------------|----------------|----------------|---------------------------------|------------------|--------|----------------------------|--------------------------------------------|-----------------------|
|                                                                     | BACSU                      | BACHA                      | LISIN          | LISMO          | LACLA                           | STRPY            | STRPN  | STAAU                      | CLOAC                                      | CLOPE                 |
| Pyruvate:ferredoxin oxidoreductase                                  | —                          | —                          | (0.51)         | (0.45)         | (0.40)                          | —                | —      | —                          | <u>1.43</u><br>1.07                        | <u>2.05</u>           |
| Phosphate acetyltransferase (pta)                                   | 1.24                       | (0.90)                     | (0.86)         | 1.18           | (0.77)                          | (0.95)           | (0.84) | 1.19                       | 1.10                                       | 1.43                  |
| Acetate kinase (ackA)                                               | 1.18                       | (0.64)                     | 1.67<br>(0.49) | 1.87<br>(0.47) | (0.75)<br>(0.61)                | (0.82)           | (0.72) | 1.14                       | 1.17                                       | 1.23<br>(0.65)        |
| Alcohol dehydrogenase (adhA)                                        | —                          | (0.80)                     | —              | —              | (0.60)                          | (0.88)           | 1.48   | (0.94)                     | —                                          | —                     |
| Alcohol dehydrogenase (adhB)                                        | (0.46)                     | (0.73)                     | —              | —              | —                               | (0.54)           | (0.83) | —                          | 1.18                                       | —                     |
| Alcohol dehydrogenase (gbsB)                                        | (0.60)                     | (0.60)                     | —              | —              | —                               | —                | (0.60) | —                          | —                                          | 1.66<br>(0.96)<br>etc |
| Alcohol-acetaldehyde dehydrogenase (adhE)                           | —                          | —                          | 2.08<br>1.39   | 2.14<br>1.44   | 1.44                            | —                | 2.22   | (0.56)                     | —                                          | 2.00<br>(0.85)        |
| L-lactate dehydrogenase (ldh)                                       | (0.76)                     | (0.69)                     | 1.63           | 1.53           | <u>2.26</u><br>(0.45)<br>(0.44) | 1.72             | 2.30   | (0.90)<br>(0.88)           | (0.94)<br>(0.80)                           | (0.78)                |
| Acetolactate synthase small subunit (ilvN)                          | (0.71)                     | (0.83)                     | (0.94)         | (1.02)         | (0.55)                          | —                | (0.60) | —                          | (0.78)                                     | —                     |
| Malate dehydrogenase (citH)                                         | (0.81)                     | 1.08                       | —              | —              | —                               | —                | —      | —                          | —                                          | —                     |
| Malate dehydrogenase (malS, mleS)                                   | 1.81<br>(0.47)             | —                          | (0.55)         | (0.68)         | 1.44                            | —                | —      | —                          | (1.01) <sup>§</sup><br>(1.00) <sup>§</sup> | —                     |
| Fumarate reductase flavoprotein subunit (frdC)                      | —                          | —                          | (0.81)         | 1.16           | —                               | —                | —      | 1.22                       | —                                          | —                     |
| Acetyl-CoA acetyltransferase (mmgA, thiL, fadA)                     | (0.55)<br>(0.52)<br>(0.45) | (0.69)<br>(0.68)<br>etc    | (0.83)         | (0.84)         | (0.51)<br>(0.49)                | (0.75)<br>(0.45) | —      | (0.59)<br>(0.47)<br>(0.46) | 1.29                                       | (1.01)                |
| 3-hydroxybutyryl-CoA dehydrogenase, NAD-dependent (mmgB, fadB, hbd) | (0.52)                     | (0.81)<br>(0.71)<br>(0.68) | —              | —              | —                               | —                | —      | —                          | <u>1.44</u>                                | 1.55                  |
| 3-hydroxybutyryl-CoA dehydratase (crotonase)                        | (0.58)                     | (0.81)<br>(0.72)           | —              | —              | —                               | —                | —      | —                          | 1.13                                       | (1.01)<br>(0.66)      |
| Butyryl-CoA (acetyl-CoA) dehydrogenase (mmgC, bcd, acdA)            | (0.56)<br>(0.54)<br>etc    | (0.94)<br>(0.66)<br>etc    | —              | —              | —                               | —                | —      | —                          | 1.44                                       | 1.70<br>(0.66)        |
| NADH-dependent butanol dehydrogenase (bdhA)                         | 1.05<br>(0.68)             | (0.66)                     | (0.61)         | (0.72)         | —                               | —                | —      | —                          | (0.87)<br>(0.83)<br>(0.76)                 | (0.52)                |
| Butyrate kinase (buk)                                               | (0.50)                     | —                          | (0.71)         | (0.59)         | —                               | —                | —      | —                          | 1.25<br>(0.82)                             | (0.84)                |
| <b>TCA cycle</b>                                                    |                            |                            |                |                |                                 |                  |        |                            |                                            |                       |
| Citrate synthase ( <i>citA</i> , <i>citZ</i> , <i>mmgD</i> )        | (0.63)<br>(0.57)<br>(0.46) | 1.22<br>(0.63)             | (0.77)         | (0.73)         | —                               | —                | —      | (0.51)                     | —                                          | —                     |

| Gene                                                             | <i>E(g)*</i>             |                  |        |        |        |        |        |                |                                            |                  |
|------------------------------------------------------------------|--------------------------|------------------|--------|--------|--------|--------|--------|----------------|--------------------------------------------|------------------|
|                                                                  | BACSU                    | BACHA            | LISIN  | LISMO  | LACLA  | STRPY  | STRPN  | STAAU          | CLOAC                                      | CLOPE            |
| Aconitate hydratase ( <i>citB</i> )                              | 1.08                     | —                | 1.05   | 1.11   | (0.37) | —      | —      | (0.85)         | —                                          | —                |
| Isocitrate dehydrogenase ( <i>citC</i> )                         | 1.33                     | 1.46             | (0.95) | (0.92) | (0.45) | —      | —      | (0.98)         | (0.97)                                     | —                |
| Succinyl-CoA synthetase, $\beta$ -subunit ( <i>sucC</i> )        | (0.63)                   | 1.29             | —      | —      | —      | —      | —      | (0.96)         | —                                          | —                |
| Succinyl-CoA synthetase, $\alpha$ -subunit ( <i>sucD</i> )       | (0.67)                   | 1.14             | —      | —      | —      | —      | —      | 1.10           | —                                          | —                |
| Succinate dehydrogenase, flavoprotein subunit ( <i>sdhA</i> )    | (0.57)                   | 1.30             | —      | —      | —      | —      | —      | (0.74)         | —                                          | —                |
| Succinate dehydrogenase, iron-sulfur protein ( <i>sdhB</i> )     | (0.63)                   | 1.02             | —      | —      | —      | —      | —      | (1.00)         | —                                          | —                |
| Succinate dehydrogenase, cytochrome b558 subunit ( <i>sdhC</i> ) | (0.64)                   | 1.17             | —      | —      | —      | —      | —      | (0.68)         | —                                          | —                |
| Malate dehydrogenase ( <i>citH</i> )                             | (0.81)                   | 1.08             | —      | —      | —      | —      | —      | —              | —                                          | —                |
| Malate dehydrogenase (malS, mleS)                                | 1.81<br>(0.47)           | —                | (0.55) | (0.68) | 1.44   | —      | —      | —              | (1.01) <sup>§</sup><br>(1.00) <sup>§</sup> | —                |
| <b>Detoxification</b>                                            |                          |                  |        |        |        |        |        |                |                                            |                  |
| Superoxide dismutase (sod)                                       | 1.64<br>(0.44)           | 1.43<br>(0.52)   | 1.39   | 1.39   | 1.21   | (0.74) | 1.78   | 1.43<br>(0.73) | —                                          | (0.76)           |
| Catalase (Kat)                                                   | 1.26<br>(0.43)<br>(0.50) | (0.66)<br>(0.49) | (0.62) | (0.56) | —      | —      | —      | (0.53)         | —                                          | —                |
| Alkyl hydroperoxide reductase subunit C (ahpC)                   | 1.66                     | —                | —      | —      | (0.74) | 1.27   | —      | 2.02           | —                                          | (0.94)           |
| Alkyl hydroperoxide reductase subunit F (ahpF)                   | 1.04                     | —                | —      | —      | (0.39) | (0.88) | —      | 1.10           | —                                          | —                |
| 2-cys peroxiredoxin                                              | 1.40                     | 1.41             | (0.67) | (0.75) | —      | —      | —      | —              | —                                          | —                |
| Thiol peroxidase (Tpx)                                           | 1.03                     | (0.94)           | (0.87) | (0.98) | (0.66) | —      | (0.77) | 1.05           | (0.87)                                     | —                |
| Thioredoxin reductase (trxB)                                     | (0.98)                   | (0.97)           | (0.84) | (0.87) | (0.96) | —      | (0.85) | (0.89)         | 1.04                                       | (0.58)<br>(0.32) |

Included are only genes that qualify as PHX in at least one of the genomes.

\*Numbers in parentheses indicate the gene is not PHX; —, the gene does not have a homolog in the genome.

†Annotated glucokinase in some genomes but transcriptional regulator NagC in others. Sequence similarity ~40%.

‡Ten homologs are present in each LISMO and LISIN.

§PA gene.
