# Supplementary material
Source: PubMed Central journal article supplement (PMC395943)
Supplement: pnas_101_16_6182__3.pdf [file pnas_101_16_6182__3.pdf]

**Table 6. Hypothetical or poorly characterized proteins PHX in multiple  $G_{low}^+$  genomes**

| BACSU                            | BACHA            | LISIN                                  | LISMO                                  | LACLA          | STRPY             | STRPN            | STAAU             | CLOAC                                | CLOPE                                                       | Comments                                         |
|----------------------------------|------------------|----------------------------------------|----------------------------------------|----------------|-------------------|------------------|-------------------|--------------------------------------|-------------------------------------------------------------|--------------------------------------------------|
| 1.36<br>yaaK                     | (0.91)<br>BH0035 | (0.98)<br>lin2851                      | 1.17<br>lmo2703                        | 1.19<br>ybcG   | (0.98)<br>SPy1862 | 1.22<br>SP1102   | 1.23<br>SAV0479   | 1.23<br>CAC0126                      | 1.22<br>CPE0046                                             | Unknown                                          |
| (0.48)<br>ykpA                   | —                | 1.22<br>lin1470                        | 1.13<br>lmo1431                        | 1.27<br>yahG   | 1.12<br>SPy2210   | (0.98)<br>SP2230 | 1.35<br>SAV1392   | 1.21<br>CAC2948                      | 1.18<br>CPE1506                                             | ABC transporter                                  |
| (0.60)<br>yebB<br>(0.43)<br>ytiP | (0.82)<br>BH0608 | 1.77<br>lin2356<br>(0.75)<br>lin0582   | 1.45<br>lmo2254<br>(0.78)<br>lmo0573   | (0.87)<br>yriD | (0.41)<br>SPy1736 | (0.77)<br>SP0287 | (0.79)<br>SAV2253 | 1.20<br>CAC2772<br>(0.90)<br>CAC2820 | (0.88)<br>CPE1575<br>(0.78)<br>CPE2582<br>(0.65)<br>CPE1751 | Possible permease                                |
| (0.73)<br>yeeI<br>(0.55)<br>yrbC | (0.68)<br>BH3259 | (0.81)<br>lin0388<br>(0.57)<br>lin1570 | (0.78)<br>lmo0369<br>(0.59)<br>lmo1535 | 1.08<br>ycdB   | (0.86)<br>SPy0316 | 1.18<br>SP1922   | (0.57)<br>SAV0669 | (0.99)<br>CAC2295                    | 1.42<br>CPE1954                                             | Unknown                                          |
| (0.98)<br>yheA                   | (0.78)<br>BH1149 | 1.17<br>lin2326                        | 1.14<br>lmo2223                        | —              | —                 | —                | 1.83<br>SAV1845   | —                                    | —                                                           | Unknown                                          |
| (0.74)<br>ykqC                   | (0.64)<br>BH2662 | 1.13<br>lin1026                        | 1.31<br>lmo1027                        | 1.09<br>yciH   | (0.81)<br>SPy1876 | (0.79)<br>SP0121 | (0.74)<br>SAV1089 | (0.75)<br>CAC1683                    | (0.70)<br>CPE1775                                           | Unknown, possibly hydrolase                      |
| (0.66)<br>yqfA                   | 1.12<br>BH1357   | 1.14<br>lin0410                        | 1.14<br>lmo0392                        | —              | —                 | —                | (0.82)<br>SAV1573 | —                                    | —                                                           | Unknown                                          |
| 1.02<br>yrbB                     | (1.03)<br>BH1270 | 1.08<br>lin1536                        | 1.53<br>lmo1501                        | (0.74)<br>ybcC | (0.65)<br>SPy2112 | 1.81<br>SP0194   | 1.20<br>SAV1615   | —                                    | —                                                           | Unknown                                          |
| 1.33<br>yrbF                     | (0.96)<br>BH1229 | 1.26<br>lin1564                        | 1.22<br>lmo1529                        | 1.24<br>ywaB   | (0.71)<br>SPy1968 | (0.76)<br>SP2029 | (0.95)<br>SAV1638 | —                                    | (0.94)<br>CPE1944                                           | Unknown, possibly preprotein translocase subunit |
| —                                | —                | 1.13<br>lin0049                        | 1.13<br>lmo0056                        | —              | —                 | —                | 1.12<br>SAV0282   | 1.20<br>CAC0040<br>(1.04)<br>CAC3713 | —                                                           | Unknown, possibly transporter                    |
| 1.69<br>yurU                     | 1.23<br>BH3467   | 1.16<br>lin2506                        | 1.13<br>lmo2411                        | (0.70)<br>yseF | (0.49)<br>SPy0290 | (0.69)<br>SP0871 | 1.31<br>SAV0846   | 1.30<br>CAC3289                      | —                                                           | Unknown                                          |
| 1.32<br>yurY                     | 1.26<br>BH3471   | 1.16<br>lin2510                        | 1.38<br>lmo2415                        | (0.62)<br>ystB | (0.65)<br>SPy0285 | 1.15<br>SP0867   | 1.37<br>SAV0842   | (1.09)<br>CAC3288                    | —                                                           | ABC transporter                                  |
| —                                | —                | 1.33<br>lin0789                        | 1.36<br>lmo0796                        | —              | —                 | —                | 1.45<br>SAV2687   | —                                    | —                                                           | Unknown                                          |

Homologous genes were identified by the Significant Segment Pair Alignment (1) using a 30% sequence similarity cutoff.

1. Brocchieri, L. & Karlin, S. (1998) *J. Mol. Biol.* **276**, 249-264.
